# Supplementary material for: Evolution of fractality in magnetized plasmas
Source: Copernicus journal article supplement (doi:10.5194/npg-2017-47), 2017-08-07
Supplement: Supplementary file [file npg-2017-47-AC1-supplement.pdf]

### **Response to the First Referee.**

First, we would like to thank the Referee for her/his comment.

The referee has made a point that the similarity report is too high even for a review article. We have addressed this issue, rewriting several portions of the manuscript, referring to the relevant references where necessary, and dropping some paragraphs not necessary for this review's discussion. We hope that the manuscript is now in a more satisfactory state.
